# Supplementary material for: Predicting the climate impact of aviation for en-route emissions: The algorithmic climate change function submodel ACCF 1.0 of EMAC 2.53
Source: Copernicus journal article supplement (doi:10.5194/gmd-2022-220), 2022-09-30
Supplement: Supplementary file 2 [file gmd-2022-220-supplement.zip]

# ACCF (version 1.0) User Manual

Algorithm Climate Change Functions submodel

Feijia Yin, et al.

Correspondence to: Feijia Yin (f.yin@tudelft.nl)

This manual is a part of the electronic supplement of our article “Predicting the climate impact of aviation for en-route emissions: The algorithmic climate change function sub model ACCF 1.0 of EMAC 2.53.0”

ACCF is a new MESSy submodel to calculate the average temperature response of aviation CO<sub>2</sub> emissions and non-CO<sub>2</sub> effects of NO<sub>x</sub> (from ozone formation and methane depletion), H<sub>2</sub>O and contrails effects through the call process of subroutines in Figure S1. The following information lists major elements of ACCF version 1.0 to be implemented in the ECHAM\_5.3.02/MESSy version 2.53 model.

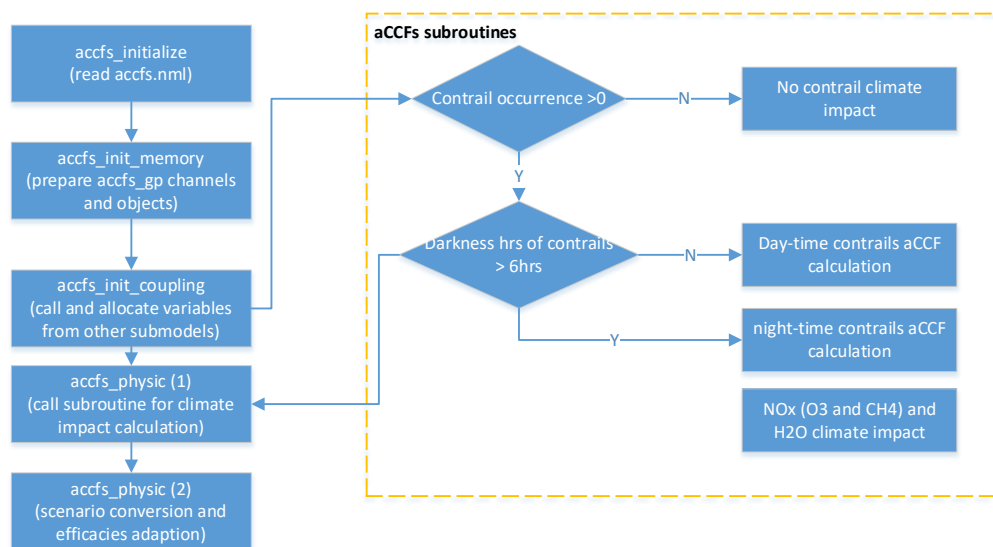

Figure S1: Calling sequence of process subroutines in ACCF submodel

## S1. Namelist

The first step before running the submodel is to define several inputs in the accfs.nml file. The template for this file can be seen in Figure S2.

```
!-*- f90 -*-
```

```
&CTRL
```

```
!-----
```

```
! for scaling
```

```
!-----
```

```
l_scen_cov = .FALSE. ! default true pulse-->BAU
```

```
l_eff_scal = .FALSE. ! default true apply efficacies for different effects
```

```
!scenario coversion pulse emisison-->BAU
```

```
scen_co2 = 9.4
```

```
scen_o3 = 14.5
```

```
scen_ch4 = 10.8
```

```
scen_h2o = 14.5
```

```
scen_contrails = 13.6
```

```
!efficacies
```

```
lamda_co2 = 1.0,
```

```
lamda_o3 = 1.37,
```

```
lamda_ch4 = 1.18,
```

```
lamda_h2o = 1.0,
```

```
lamda_contrails = 0.42,
```

```
!-----
```

```
! for coupling
```

```
!-----
```

```
l_cpl_rad = .TRUE.,
```

```
l_cpl_tropop = .TRUE.,
```

```
l_cpl_orbit = .TRUE.,
```

```

l_cpl_contrail = .TRUE.
/
&CPL
!-----
!coupling with accfs
!-----
c_LR_rad      = 'rad01','flxt',
c_pv_tropop   = 'tropop','PV',
c_cossa_orbit = 'orbit','cossa',
c_dec_orbit   = 'orbit','dec',
c_potcov_contrail = 'contrail_gp','potcov'
/

```

Figure S2: ACCF submodel namelist example

### S1.1 Process switches

- l\_scen\_cov: switch to determine whether the pulse emission scenario is converted into an increasing scenario of BAU (Business As Usual).
- l\_eff\_scal: switch to determine whether the efficacies of climate impact of O<sub>3</sub>, CH<sub>4</sub>, H<sub>2</sub>O, and contrails are applied.
- l\_cpl\_rad: switch to determine whether the coupling with RAD submodel is activated
- l\_cpl\_tropop: switch to determine whether the coupling with TROPOP submodel is activated
- l\_cpl\_orbit: switch to determine whether the coupling with ORBIT submodel is activated
- l\_cpl\_contrail: switch to determine whether the coupling with CONTRAIL submodel is activated

### S1.2 Physics parameters

- scen\_o3: the scenario conversion factor for O<sub>3</sub>
- scen\_ch4: the scenario conversion factor for CH<sub>4</sub>
- scen\_h2o: the scenario conversion factor for H<sub>2</sub>O
- lamda\_co2: efficacy of CO<sub>2</sub> climate impact
- lamda\_o3: efficacy of O<sub>3</sub> climate impact
- lamda\_ch4: efficacy of CH<sub>4</sub> climate impact
- lamda\_h2o: efficacy of H<sub>2</sub>O climate impact
- lamda\_contrails: efficacy of contrails climate impact

### S1.3 Channel and object names to access input data

- c\_LR\_rad: longwave radiative flux
- c\_pv\_tropop: potential vorticity
- c\_cossa\_orbit: solar zenith angel
- c\_dec\_orbit: solar declination angel
- c\_potcov\_contrail: contrail potential coverage

## S2 Coupling with other MESSy submodels

For its computations, ACCF requires some variables from the other MESSy submodels:

- Outgoing Longwave Radiation (OLR) from RAD (Dietmüller et al., 2016)
- Potential vorticity (PV) from TROPOP (Jöckel et al., 2006)

- Potential contrail coverage (potcov) from CONTRAIL (Supplement of Grewe et al., 2014a; Yin et al., 2018)
- Solar declination angel (dec\_ang) from ORBIT (Dietmüller et al., 2016)

### S3 Starting a simulation

To prepare an ACCF run, activate the submodel (set USE\_ACCF = .TRUE. in switch.nml), set all input parameters in accf.nml and other namelists.

### S4 Output

Running EMAC/ACCF generates standard MESSy output file to store the output parameters. A list of output variables in the ACCF channel can be seen in Table S1.

Table S1: List of variables in accf\_gp channel

| Variable       | Description                                                    | Unit                   | Dimension     |
|----------------|----------------------------------------------------------------|------------------------|---------------|
| atr20_co2      | ATR20 by aviation en-routing CO <sub>2</sub> emissions         | K/kg(fuel)             | LON, LAT, LEV |
| atr20_o3       | ATR20 ozone by aviation en-routing NO <sub>x</sub> emissions   | K/kg(NO <sub>2</sub> ) | LON, LAT, LEV |
| atr20_ch4      | ATR20 methane by aviation en-routing NO <sub>x</sub> emissions | K/kg(NO <sub>2</sub> ) | LON, LAT, LEV |
| atr20_h2o      | ATR20 by aviation en-routing H <sub>2</sub> O emissions        | K/kg(fuel)             | LON, LAT, LEV |
| atr20_contrail | ATR20 by aviation contrails (day or night)                     | K/km(contrail)         | LON, LAT, LEV |

### References

- Dietmüller, S., Jöckel, P., Tost, H., Kunze, M., Gellhorn, C., Brinkop, S., Frömming, C., Ponater, M., Steil, B., Lauer, A. and Hendricks, J. (2016). "A new radiation infrastructure for the Modular Earth Submodel System (MESSy, based on version 2.51)." Geoscientific Model Development, 9(6): 2209-2222. DOI: 10.5194/gmd-9-2209-2016.
- Grewe, V., Frömming, C., Matthes, S., Brinkop, S., Ponater, M., Dietmüller, S., Jöckel, P., Garny, H., Tsati, E. and Dahlmann, K. (2014a). "Aircraft routing with minimal climate impact: the REACT4C climate cost function modelling approach (V1. 0)." Geoscientific Model Development, 7(1): 175-201.
- Jöckel, P., Tost, H., Pozzer, A., Brühl, C., Buchholz, J., Ganzeveld, L., Hoor, P., Kerkweg, A., Lawrence, M. G., Sander, R., Steil, B., Stiller, G., Tanarhte, M., Taraborrelli, D., van Aardenne, J. and Lelieveld, J. (2006). "The atmospheric chemistry general circulation model ECHAM5/MESSy1: consistent simulation of ozone from the surface to the mesosphere." Atmospheric Chemistry and Physics, 6(12): 5067-5104. DOI: 10.5194/acp-6-5067-2006.
- Yin, F., Grewe, V., Frömming, C. and Yamashita, H. (2018). "Impact on flight trajectory characteristics when avoiding the formation of persistent contrails for transatlantic flights." Transportation Research Part D: Transport and Environment, 65: 466-484. DOI: <https://doi.org/10.1016/j.trd.2018.09.017>.
